# Supplementary material
Source: PubMed Central journal article supplement (PMC1761965)
Supplement: plntphys_pp.106.087304_1.pdf [file plntphys_pp.106.087304_1.pdf]

actaaaccaatataca

caaaacagaaacacccaaaaactcaaaaagataaagaaa ATG TCT TCC TTT TTA GTA TCA 59  
M S S F L V S 7

TCA AAT AAT CTT CCA GAA CGT GAA ATC CCA GGT GAC TAT GGT TTC CCT ATT 110  
S N N L P E R E I P G D Y G F P I 24

ATC AGC GCC ATT AAA GAT CGA TAC GAT TAC TTT TAC AAA CAA GGT GAA GAT 161  
I S A I K D R Y D Y F Y K Q G E D 41

GTT TGG TTT CAT ASC AAA GCT GAA AAA TAC AAT TCC ACC GTT GTC AAA ATC 212  
V W F H S K A E K Y N S T V V K I 58

↘

AAC ATG GCA CCA GGC CCA TTC ACC TCT AAT GAC TAC AAA TTG GTG GCA TTT 263  
N M A P G P F T S N D Y K L V A F 75

CTA GAT GCC AAC AGC TTT GTC TAT ATG TTT GAT AAC TCT CTC ATT GAC AAA 314  
L D A N S F V Y M F D N S L I D K 92

ACT GAC ACT CTT GGT GGT ACA TTC AAG CCT GGT AAA GAG TAC TAC GGT GGT 365  
T D T L G G T F K P G K E Y Y G G 109

TAT CGT CCT GTT GCT TTT GTC GAT ACT TCT GAC CCT AAC CAC GCT GCT CTG 416  
Y R P V R A F V D T S D P N H A A L 126

AAA AAC TAT ATT CTT ACT TCA TTC GCT AAG CGA CAT AAC TTA TTC ATT OCT 467  
K N Y I L T S F A K R H N L F I P 143

CTA TTT AGA AAC TCA GTG TCT GAT CAC CTC TTT CAA AAT CTT GAA AAA CAG 518  
L F R N S V S D H L F Q N L E K Q 160

GTT TCT GAT CAG GGG AAG TCA GAT TTC AAT GCA CTT CTC CCG AAT ATG ACG 569  
V S D Q G K S D F N A L L P N M T 177

TTT GGT TTC ATT TTT CGC TTG CTT TGT GAC CAA ACT AAT CCA TCT GAT ACA 620  
F G F I F R L L C D Q T N P S D T 194

GTT CTT GGC GCT CAA GGA CCA GAA CAT CTT CGC AAA TGG CTT TTT CCT CAG 671  
V L G A Q G P E H L R K W L F P Q 211

CTT ATT CCA TCA TTG AGT GCG AGA AAA CTT CCT AGC TTT ATA GAA GAT TTG 722  
L I P S L L S A R K L P S F I E D L 228

CTC TTC CAT AAT TTC CTG ATA CCA TTT GGT CTC GTG AAA AGT GAT TAC AAT 773  
L F H N F L I P F G L V K S D Y N 245

AAG CTT GTT GAT GCA TTT AGC AAG AAT GCA GGG TCC ATG TTA GAT GAA GCT 824  
K L V D A F S K N A G S M L D E A 262

GAG AAA CTT GGG ATC AAA AGA GAG GAA GCT GTA CAT AAC ATA CTT TTC CTC 875  
E K L G I K R E E A V H N I L F L 279

*O<sub>2</sub>-binding pocket*

GTA GGA ATT AAT ATG TTT GCC GGC TTG AAT GCT TTC TTC CCT CAT CTC ATC 926  
V G I N M F A G L N A F F P H L I 296

\* \*

AGG TTT GTG GGC GAA GCG GGG CCT ACT CTA CAC GCT CGA CTT GCT AAA GAA 977  
R F V G E A G P T L H A R L A K E 313

ATC AGG ACA GCT ATA AAG GAA GAA GGA GGG GCA GTC ACA TTA TCA GCA ATC 1028  
I R T A I K E E G G A V T L S A I 330

AAC AAG ATG AGT TTG GTC GAG TCC ATA GTC TAT GAA ACG TTG AGG CTA CGT 1079  
N K M S L V E S I V Y E T L R L R 347

CCA CCA GTG CCA CTA CAG TAC GGT AAG GCC AAA AAA GAT TTC ATG GTC CAG 1130  
P P V P L Q Y G K A K K D F M V Q 364

AGC CAT GAT GCA TCT TAC ATG ATC AAG AAA GGT CAG TTC CTC GTC GSA TAT 1181  
S H D A S Y M I K K G Q F L V G Y 381

CAG CCC ATG GCT AGT AGG GAT CCC AAG ATT TTC GAC AAG CCC GAC GAT TTT 1232  
Q P M A S R D P K I F D K P D D F 398

ATC CCT GAT AGG TTC ATG GGA GAA GGA GTG AAA ATG L K H V L 1283  
I F D R F M G E G V K M L K H V L 415

*Heme-binding domain*

TGG TCT AAT GGA AGG GAA ACA GAG AAT CCA GCA CCA GAT AAT AAG CAA TGT 1334  
W S N G R E T E N P A P D N K Q C 432

#

GCA GGA AAA GAC TTG GTG CAT TTG TTG GGC AGG CTA ATG TTG GTG GAG TTT 1385  
A G K D L V H L L G R L M L V E F 449

TTC TTG AGA TAT GAC ACT TTC ACC GTG GAA ATC ACT CCT CTC TTT CGC GCA 1436  
F L R Y D T F T V E I T P L F R A 466

CCA AAT GTT GCA ATC AAG ACA TTA ACT AAA GCA ACT TGA ttttctgatgtatt 1489  
P N V A I K T L T K A T \* 479

ggatgcttaatcaagtcatcaagtgtgtgtgctgcatgggtgttcttgcaataattattgaattttt 1556

aatttgtattgtatttataaattggttgttgtatttctatttttattgaaatgaataaact 1623

agaagaattacacattgt +aaaaaaaaaaaaaaaa 1641

**Figure 1S**  
Fammartino, Cardinale et al  
Plant Physiology
