# Supplementary material
Source: PubMed Central journal article supplement (PMC1761965)

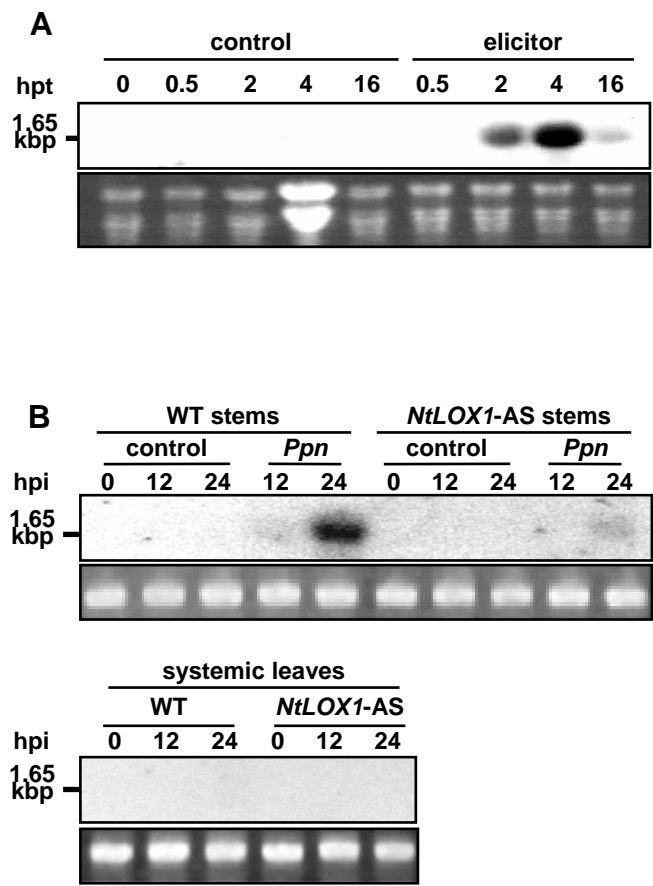

**Figure 2S**

*Fammartino, Cardinale et al  
Plant Physiology*

Supplement: plntphys_pp.106.087304_2.pdf [file plntphys_pp.106.087304_2.pdf]
